# Supplementary material
Source: ML conference proceedings conference paper supplement (https://aclanthology.org/D19-5229)
Supplement: Attachment [file Pages from Diac_EMNLP (2).pdf › Pages from Diac_EMNLP (2).pdf]

## A FFNN Models in Details

This section discusses the details of the FFNN models.

### A.1 Basic Model

After a massive exploration for finding the best hyperparameters to structure the model (like the number of layers, number of neurons in each layer, and the activation function), the final structure is shown in Table 11. This model results in 92.87%, 90.72% and 90.67% accuracies for training, validation, and testing datasets, respectively. Figure 7 shows the loss and accuracy values on the training and validation datasets while training. The model is still able to slightly learn as well as generalize even after 300 epochs with no signs of overfitting.

Table 11: FFNN basic model structure

| Layer Name                      | Neurons | Activation Func |
|---------------------------------|---------|-----------------|
| Hidden 1                        | 200     | ReLU            |
| Hidden 2                        | 500     | ReLU            |
| Hidden 3                        | 500     | ReLU            |
| Hidden 4                        | 450     | ReLU            |
| Hidden 5                        | 400     | ReLU            |
| Hidden 6                        | 400     | ReLU            |
| Hidden 7                        | 350     | ReLU            |
| Hidden 8                        | 300     | ReLU            |
| Hidden 9                        | 300     | ReLU            |
| Hidden 10                       | 250     | ReLU            |
| Hidden 11                       | 200     | ReLU            |
| Hidden 12                       | 200     | ReLU            |
| Hidden 13                       | 150     | ReLU            |
| Hidden 14                       | 100     | ReLU            |
| Hidden 15                       | 100     | ReLU            |
| Hidden 16                       | 50      | ReLU            |
| Hidden 17                       | 25      | ReLU            |
| Output                          | 15      | Softmax         |
| Trainable Parameters: 1,501,115 |         |                 |

### A.2 100-Hot Model

Starting from the the basic model structure (Table 11), and by tuning the hyperparameters and using extra techniques, such as applying Dropout regularization, the model is able to learn better using the 100-hot representations. The model is structured as shown in Table 12. This model results in 94.25%, 93.49% and 93.45% accuracies for training, validation, and testing datasets, respectively. This is an improvement of 2.78% on

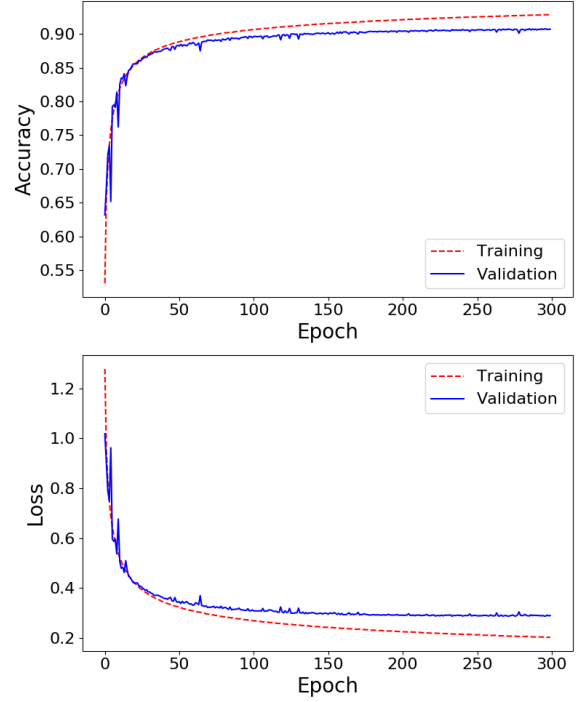

Figure 7: FFNN basic model training and validation accuracy and loss.

the test set accuracy compared to the basic model. Figure 8 shows the loss and accuracy values on the training and validation datasets while training.

### A.3 Embeddings Model

Using a very similar structure as the 100-hot model structure (Table 12), this model is structured as shown in Table 13. It achieves the best results compared to the basic and 100-hot models with 94.88%, 94.53% and 94.49% accuracies for training, validation, and testing datasets, respectively. This model improves the accuracy by 1.04% on the test set compared to the 100-hot model while reducing the number of trainable parameters (model size) by 51.46% and 62.66% compared to the basic and 100-hot models, respectively. Figure 9 shows the loss and accuracy values on the training and validation datasets while training.

Figure 10 shows the best diacritization examples diacritized using each FFNN model, while Figure 11 shows the worst diacritization examples. It is worth mentioning that the worst examples (listed in Figure 11) are from old Arabic poetry, which is very hard to diacritize flawlessly even for native speakers.

Table 12: FFNN 100-Hot model structure

| Layer Name                      | Neurons | Activation Func |
|---------------------------------|---------|-----------------|
| One Hot                         | N/A     | N/A             |
| Flatten                         | N/A     | N/A             |
| Dropout 1 (2.5%)                | N/A     | N/A             |
| Hidden 1                        | 250     | ReLU            |
| Dropout 2 (2.5%)                | N/A     | N/A             |
| Hidden 2                        | 200     | ReLU            |
| Dropout 3 (2.5%)                | N/A     | N/A             |
| Hidden 3                        | 150     | ReLU            |
| Dropout 4 (2.5%)                | N/A     | N/A             |
| Hidden 4                        | 100     | ReLU            |
| Dropout 5 (2.5%)                | N/A     | N/A             |
| Hidden 5                        | 50      | ReLU            |
| Dropout 6 (2.5%)                | N/A     | N/A             |
| Output                          | 15      | Softmax         |
| Trainable Parameters: 1,951,515 |         |                 |

Table 13: FFNN Embeddings model structure

| Layer Name                    | Neurons | Activation Func |
|-------------------------------|---------|-----------------|
| Embedding (25)                | N/A     | N/A             |
| Flatten                       | N/A     | N/A             |
| Dropout (10%)                 | N/A     | N/A             |
| Hidden 1                      | 250     | ReLU            |
| Hidden 2                      | 200     | ReLU            |
| Hidden 3                      | 150     | ReLU            |
| Hidden 4                      | 100     | ReLU            |
| Hidden 5                      | 50      | ReLU            |
| Output                        | 15      | Softmax         |
| Trainable Parameters: 728,590 |         |                 |

## B RNN Models in Details

This section provides details for the trained RNN models. First of all, Figure 12 shows the validation DER of each model while training, reported every 5 epochs. This clarifies the importance of the dataset size, where any model significantly improves their DER when trained with the extra train dataset compared to any other model trained without it.

Moreover, to explore the embeddings learnt by our best model, the weights vectors from the embeddings layer were extracted and reduced to 2 dimensions instead of 25 using t-SNE dimensionality reduction algorithm (Maaten and Hinton, 2008), then plotted in 2D space as shown in Figure 13. The embeddings are able to capture meaningful information where digits appear together at the bottom-left, the majority of the punctuati-

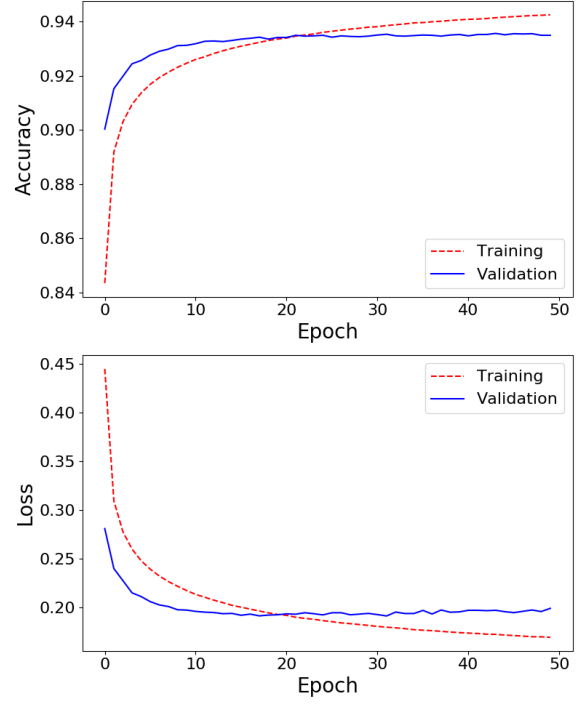

Figure 8: FFNN 100-Hot model training and validation accuracy and loss.

ons appear at the middle and the top-left side, and finally, the Arabic letters appear at the right side.

Figures 14 and 15 show both best and worst examples from diacritizing using each RNN model. An important note is that the old Arabic poetry lines are no longer the majority in the worst examples, in contrast to the FFNN models.

Finally, Figures 16 and 17 shows the confusion matrices related to our best model when trained without and with the extra train dataset, respectively. By comparing them, it is easy to see that the Shadda class is the worst one in both cases. However, the case with the extra train dataset shows dramatic improvement in this class, as well as other classes like Shadda + another diacritic and the Dammatan. A justification for this improvement is that there is a larger number of examples in the extra train dataset related to these classes as shown in Table 14. Another insight can be concluded from the confusion matrices is that the model usually misclassifies the Shadda class as Shadda + another diacritic class due to different diacritization conventions, which in many cases would be a grammatically correct guess.

Table 14: Number of examples for each class

|                    | Train  | Valid | Test | Extra Train | Total   | %     |
|--------------------|--------|-------|------|-------------|---------|-------|
| No Diacritic       | 4,366K | 213K  | 222K | 46,647K     | 51,449K | 38.87 |
| Fatha              | 2,932K | 144K  | 150K | 31,287K     | 34,514K | 26.07 |
| Fathatah           | 58K    | 3K    | 3K   | 626K        | 691K    | 00.52 |
| Damma              | 812K   | 39K   | 41K  | 8,648K      | 9,539K  | 07.20 |
| Dammatan           | 58K    | 3K    | 3K   | 622K        | 686K    | 00.51 |
| Kasra              | 1,265K | 62K   | 64K  | 13,533K     | 14,924K | 11.27 |
| Kasratan           | 88K    | 4K    | 4K   | 941K        | 1,037K  | 00.78 |
| Sukun              | 1,230K | 60K   | 63K  | 13,135K     | 14,487K | 10.94 |
| Shaddah            | 6K     | 254   | 471  | 66K         | 73K     | 00.05 |
| Shaddah + Fatha    | 300K   | 15K   | 15K  | 3,202K      | 3,532K  | 02.66 |
| Shaddah + Fathatah | 3K     | 189   | 132  | 36K         | 40K     | 00.03 |
| Shaddah + Damma    | 43K    | 2K    | 2K   | 463K        | 511K    | 00.38 |
| Shaddah + Dammatan | 5K     | 238   | 222  | 51K         | 56K     | 00.04 |
| Shaddah + Kasra    | 64K    | 3K    | 3K   | 679K        | 749K    | 00.56 |
| Shaddah + Kasratan | 6K     | 298   | 273  | 63K         | 69K     | 00.05 |

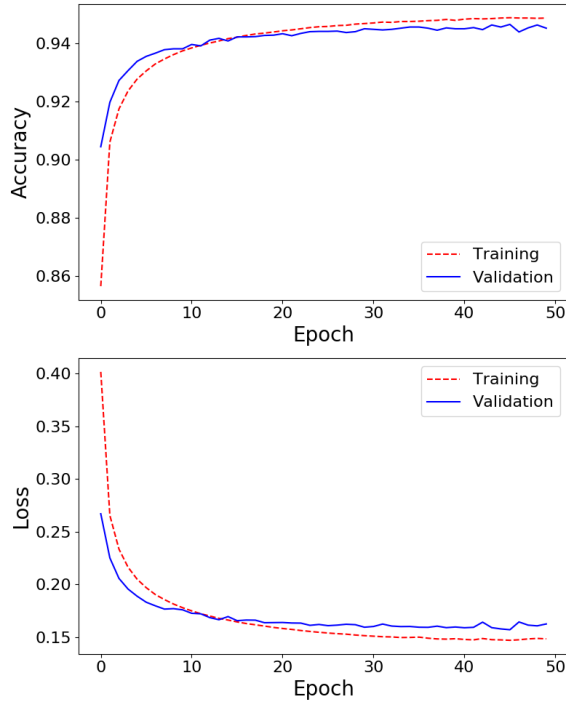

Figure 9: FFNN Embeddings model training and validation accuracy and loss.

| Model           | Best Line              |                                                                                                                                                                                                      | File                          |
|-----------------|------------------------|------------------------------------------------------------------------------------------------------------------------------------------------------------------------------------------------------|-------------------------------|
| FFNN Basic      | Correct Diacritization | 464 - حَدَّثَنِي يَحْيَى عَنْ مَالِكٍ عَنْ هِشَامِ بْنِ عُرْوَةَ عَنْ أَبِيهِ<br>Buckwalter Transliteration: 464 - Had~avaniy yaHoyaY Eano maAlik Eano hi\$Aami boni Eurowapa Eano >abiyhi           | موطأ مالك                     |
|                 | Model's Output         | 464 - حَدَّثَنِي يَحْيَى عَنْ مَالِكٍ عَنْ هِشَامِ بْنِ عُرْوَةَ عَنْ أَبِيهِ<br>Buckwalter Transliteration: 464 - Had~avaniy yaHoyaY Eano maAlik Eano hi\$Aami boni Eurowapa Eano >abiyhi           |                               |
| FFNN 100-Hot    | Correct Diacritization | فَإِذَا ادَّعَى شَخْصٌ عَلَى غَيْرِهِ بِأَنَّهُ رَقِيقٌ فَعَلَيْهِ الْبَيَانُ .<br>Buckwalter Transliteration: fa<i*aA Ad~aEaY \$axoSN EalaY gayorihi bi>an~ahu raqiyqN faEalayohi AlobayaAnu .      | الروض الأنف                   |
|                 | Model's Output         | فَإِذَا ادَّعَى شَخْصٌ عَلَى غَيْرِهِ بِأَنَّهُ رَقِيقٌ فَعَلَيْهِ الْبَيَانُ .<br>Buckwalter Transliteration: fa<i*aA Ad~aEaY \$axoSN EalaY gayorihi bi>an~ahu raqiyqN faEalayohi AlobayaAnu .      |                               |
| FFNN Embeddings | Correct Diacritization | وَالْهَآوُنُ مِثَالٌ ، فَمِثْلُهُ كُلُّ مَا يَتَعَذَّرُ كَسْرُهُ عَلَى رَأْسِهَا .<br>Buckwalter Transliteration: waAlohaAwanu mivaAlN • famivoluhu kul~u maA yataEa*~aru kasoruhu EalaY ra>osihaA . | مبعث النبي صلى الله عليه وسلم |
|                 | Model's Output         | وَالْهَآوُنُ مِثَالٌ ، فَمِثْلُهُ كُلُّ مَا يَتَعَذَّرُ كَسْرُهُ عَلَى رَأْسِهَا .<br>Buckwalter Transliteration: waAlohaAwanu mivaAlN • famivoluhu kul~u maA yataEa*~aru kasoruhu EalaY ra>osihaA . |                               |

Figure 10: FFNN models good diacritization examples.

| Model           | Worst Line             |                                                                                                                                                                                                    | File                          |
|-----------------|------------------------|----------------------------------------------------------------------------------------------------------------------------------------------------------------------------------------------------|-------------------------------|
| FFNN Basic      | Correct Diacritization | أَنْصَابِ مَكَّةَ عَامِدِينَ لِيُثْرِبَ ... فِي ذِي غِيَاظِلَ جَحْفَلِ جَبْجَابِ<br>Buckwalter Transliteration: >anoSaAbi mak~pa EaAmidiyna liyavoribi ... fiy *iy gayaATila jaHofalK jabojaAbi    | سيرة ابن هشام                 |
|                 | Model's Output         | أَنْصَابِ مَكَّةَ عَامِدِينَ لِيُثْرِبَ ... فِي ذِي غِيَاظِلَ جَحْفَلِ جَبْجَابِ<br>Buckwalter Transliteration: >noSaAba mak~apa EaAmid~iyoni liyuviribu ... fiy *iy giyaATulu jaHafalu jabojaAabK |                               |
| FFNN 100-Hot    | Correct Diacritization | لَوْلَا جَرِيرٌ هَلَكَتْ بِحِيلَةٍ ... نَعِمَ الْفَتَى ، وَيُسَسَ الْقَبِيلَةَ<br>Buckwalter Transliteration: lawolaA jariyrN halakato bajiyloho ... niEoma AlofataY • wabi}osa Aloqabiyloho       | الروض الأنف                   |
|                 | Model's Output         | لَوْلَا جَرِيرٌ هَلَكَتْ بِحِيلَةٍ ... نَعِمَ الْفَتَى ، وَيُسَسَ الْقَبِيلَةَ<br>Buckwalter Transliteration: lawalaA jariyra halakato bijayolihi ... naEamo AlofataY • wabi}isa Aloqabiyliho      |                               |
| FFNN Embeddings | Correct Diacritization | فَكُلُّ صَدِيقٍ وَابْنٍ أُخْتِ نَعْدُهُ لَعْمَرِي وَجَدْنَا غِبَهُ غَيْرَ طَائِلِ<br>Buckwalter Transliteration: fakul~ SadiyqK waAboni >uxotK naEud~hu laEamoriy wajadonaA gib~hu gayora TaA}ili  | مبعث النبي صلى الله عليه وسلم |
|                 | Model's Output         | فَكُلُّ صَدِيقٍ وَابْنٍ أُخْتِ نَعْدُهُ لَعْمَرِي وَجَدْنَا غِبَهُ غَيْرَ طَائِلِ<br>Buckwalter Transliteration: fakul~u SadiyqK waAbonu >uxoti naEoduhu liEumoriy wajadonaA gabohi gayoru TaA}ilK |                               |

Figure 11: FFNN models bad diacritization examples.

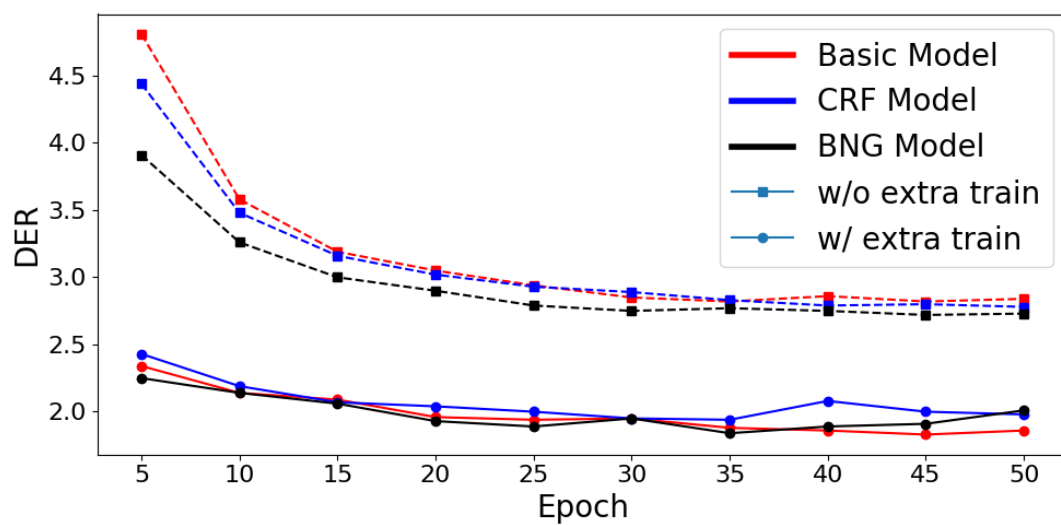

Figure 12: Recurrent models validation DER while training.

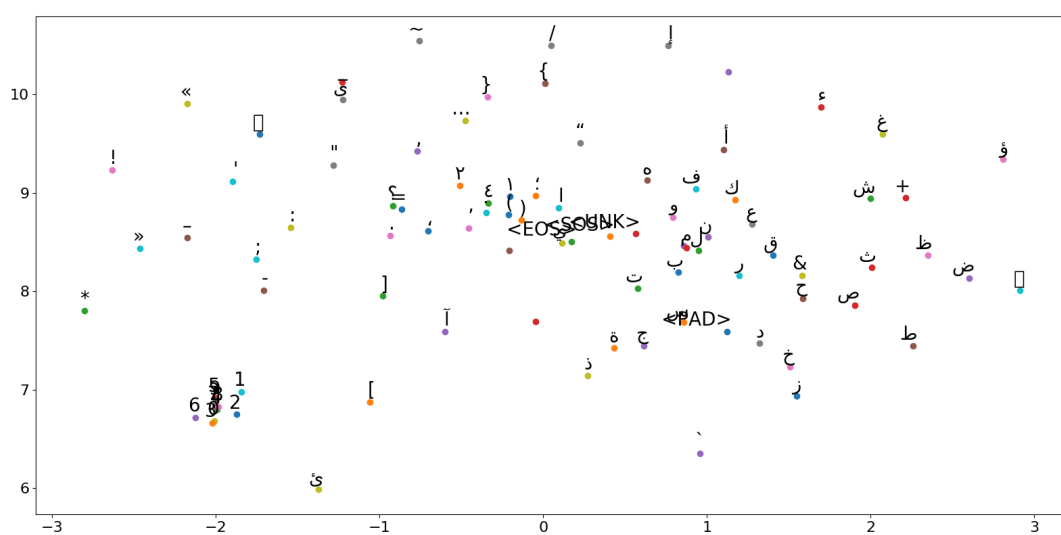

Figure 13: Embeddings plotted in 2D space.

| Model     | Best Line              |                                                                                                                                                                                                                                                                       | File                              |
|-----------|------------------------|-----------------------------------------------------------------------------------------------------------------------------------------------------------------------------------------------------------------------------------------------------------------------|-----------------------------------|
| RNN Basic | Correct Diacritization | <p>قَوْلُهُ : ( وَبَحَثَ الرَّافِعِيُّ صَحَّتَهَا ) وَإِنْ قَصِدَ تَمْلِيكَ الْمَسْجِدِ وَهُوَ الْمُعْتَمَدُ</p> <p>Buckwalter Transliteration: qawoluhu : ( wabaHava Alr~aFiEiy~u SiH~atahaA ) wa&lt;ino qaSada tamoliyka Alomasojidi wahuwa AlomuEotamadu</p>       | حاشية<br>البيهري<br>على<br>الخطيب |
|           | Model's Output         | <p>قَوْلُهُ : ( وَبَحَثَ الرَّافِعِيُّ صَحَّتَهَا ) وَإِنْ قَصِدَ تَمْلِيكَ الْمَسْجِدِ وَهُوَ الْمُعْتَمَدُ</p> <p>Buckwalter Transliteration: lilomurotahini qabola Huluwli &gt;ajali Ald~ayoni bi&gt;ano qay~adahaA bizamanK &gt;awo Eamalk yanoqaDiy qabolahu</p> |                                   |
| RNN CRF   | Correct Diacritization | <p>لِلْمَرْتَيْنِ قَبْلَ حُلُولِ أَجْلِ الدِّينِ بِأَنْ قَيَّدَهَا بِزَمَنِ أَوْ عَمَلٍ يَنْقَضِي قَبْلَهُ</p> <p>Buckwalter Transliteration: lilomurotahini qabola Huluwli &gt;ajali Ald~ayoni bi&gt;ano qay~adahaA bizamanK &gt;awo Eamalk yanoqaDiy qabolahu</p>   | منح<br>الجليل<br>مختصر<br>خليل    |
|           | Model's Output         | <p>لِلْمَرْتَيْنِ قَبْلَ حُلُولِ أَجْلِ الدِّينِ بِأَنْ قَيَّدَهَا بِزَمَنِ أَوْ عَمَلٍ يَنْقَضِي قَبْلَهُ</p> <p>Buckwalter Transliteration: qawoluhu : ( wabaHava Alr~aFiEiy~u SiH~atahaA ) wa&lt;ino qaSada tamoliyka Alomasojidi wahuwa AlomuEotamadu</p>         |                                   |
| RNN BNG   | Correct Diacritization | <p>وَلِذَا قَالَ وَلَوْ لَمْ يَقُلْ أَيُّ الْمُوتِقِ إِنْ فَعَلَ شَيْئًا مِنْهَا بِأَنْ قَالَ</p> <p>Buckwalter Transliteration: wali*aA qaAla walawo lamo yaqulo &gt;ayo Alomuwav~iqu &lt;no faEala \$ayo}FA minohaA bi&gt;ano qaAla</p>                             | شرح<br>مختصر<br>خليل<br>للفرشي    |
|           | Model's Output         | <p>وَلِذَا قَالَ وَلَوْ لَمْ يَقُلْ أَيُّ الْمُوتِقِ إِنْ فَعَلَ شَيْئًا مِنْهَا بِأَنْ قَالَ</p> <p>Buckwalter Transliteration: wali*aA qaAla walawo lamo yaqulo &gt;ayo Alomuwav~iqu &lt;no faEala \$ayo}FA minohaA bi&gt;ano qaAla</p>                             |                                   |

Figure 14: RNN models good diacritization examples.

| Model     | Worst Line             |                                                                                                                                                                                                                                                  | File                      |
|-----------|------------------------|--------------------------------------------------------------------------------------------------------------------------------------------------------------------------------------------------------------------------------------------------|---------------------------|
| RNN Basic | Correct Diacritization | <p>وَبَكَّيْهِ لِلْأَيْتَامِ وَالرِّيحِ زَفْرَةً ... وَتَشْبِيبُ قَدْرٍ طَالَمَا أَزِيدَتْ تَغْلِي</p> <p>Buckwalter Transliteration: wabak~yhi lilo&gt;ayotaAmi waAlr~yHu zafozapN ... wata\$obiybu qidorK TaAlamaA &gt;azobadato tagoliy</p>   | سيرة ابن<br>هشام          |
|           | Model's Output         | <p>وَبَكَّيْهِ لِلْأَيْتَامِ وَالرِّيحِ زَفْرَةً ... وَتَشْبِيبُ قَدْرٍ طَالَمَا أَزِيدَتْ تَغْلِي</p> <p>Buckwalter Transliteration: wabakayohu lilo&gt;ayotaAmi waAlr~iyHi zafozapu ... wata\$obiybu qadorK TaAlimFA &gt;azobadoto tagoliy</p> |                           |
| RNN CRF   | Correct Diacritization | <p>وَنَقَلَ فِي مَوْضِعٍ آخَرَ تَعْلِيلَهُ بِأَنَّهُ لَا يَقْلَعُ النَّجَسَ لِلزَّوْجَتِهِ .</p> <p>Buckwalter Transliteration: wanaqala fiy mawoDEK  xara taEoliylahu bi&gt;an~ahu laA yuqolEu Aln~ajasa liluzuwjatihi .</p>                    | شرح<br>البيهقي<br>الوردية |
|           | Model's Output         | <p>وَنَقَلَ فِي مَوْضِعٍ آخَرَ تَعْلِيلَهُ بِأَنَّهُ لَا يَقْلَعُ النَّجَسَ لِلزَّوْجَتِهِ .</p> <p>Buckwalter Transliteration: wanuqila fiy mawoDEK  xara taEoliyluhu bi&gt;an~ahu laA yaqolaEu Aln~ajisa lilz~awojatahi .</p>                  |                           |
| RNN BNG   | Correct Diacritization | <p>وَنَقَلَ فِي مَوْضِعٍ آخَرَ تَعْلِيلَهُ بِأَنَّهُ لَا يَقْلَعُ النَّجَسَ لِلزَّوْجَتِهِ .</p> <p>Buckwalter Transliteration: wanaqala fiy mawoDEK  xara taEoliylahu bi&gt;an~ahu laA yuqolEu Aln~ajasa liluzuwjatihi .</p>                    | شرح<br>البيهقي<br>الوردية |
|           | Model's Output         | <p>وَنَقَلَ فِي مَوْضِعٍ آخَرَ تَعْلِيلَهُ بِأَنَّهُ لَا يَقْلَعُ النَّجَسَ لِلزَّوْجَتِهِ .</p> <p>Buckwalter Transliteration: wanuqila fiy mawoDEK  xara taEoliyluhu bi&gt;an~ahu laA yaqolaEu Aln~ajisa lilz~awojataho .</p>                  |                           |

Figure 15: RNN models bad diacritization examples.

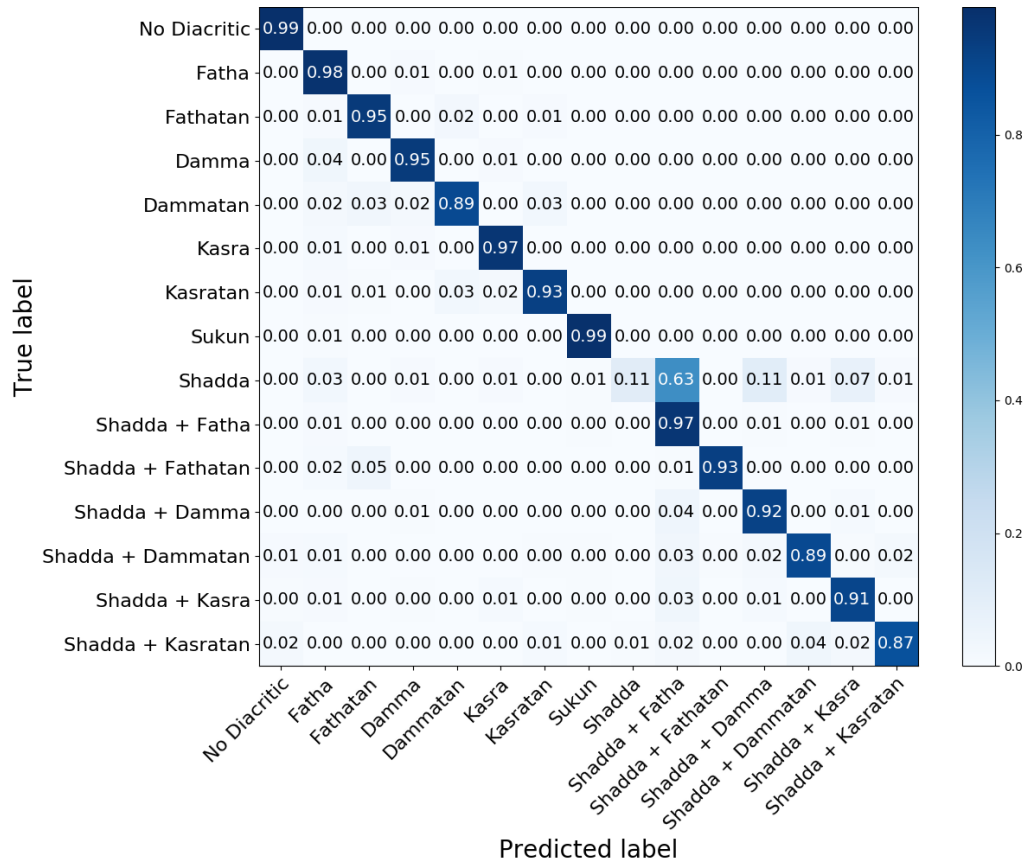

Figure 16: Without extra train confusion matrix for the best BNG model.

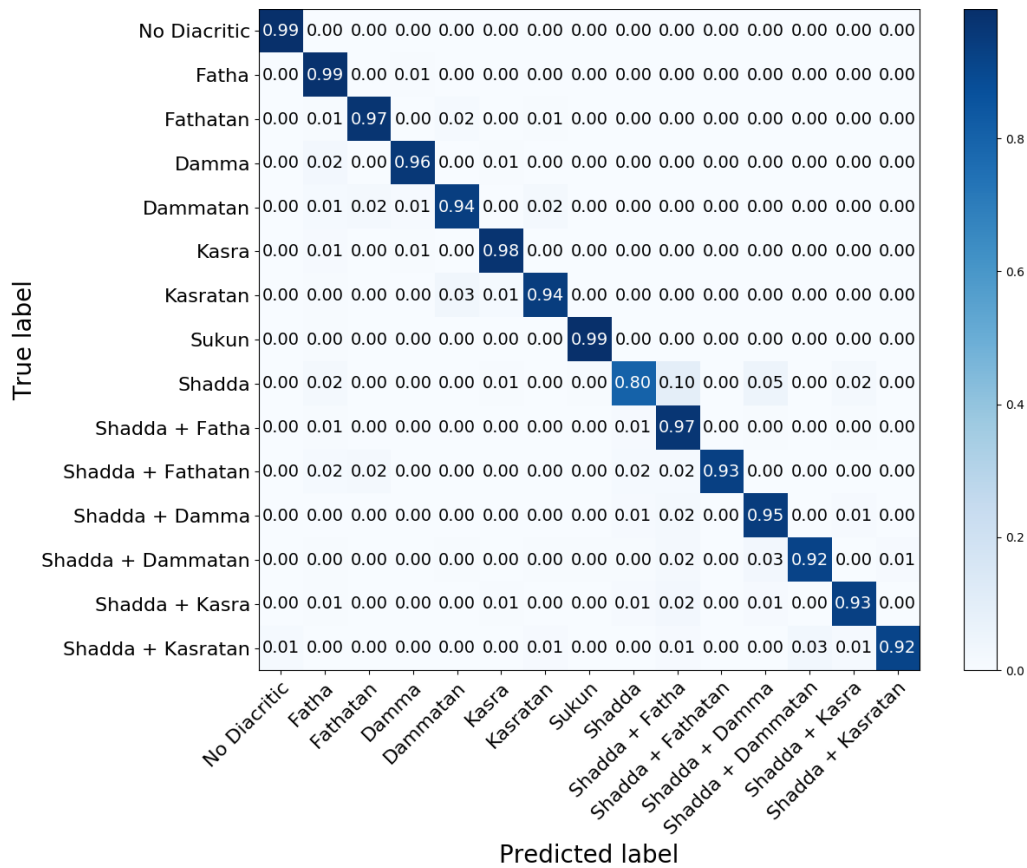

Figure 17: With extra train confusion matrix for the best BNG model.
